# Supplementary material for: Manipulation of multiphase morphology in the reactive blending system OBC/PLA/EGMA
Source: Royal Society of Chemistry journal article supplement (doi:10.1039/c5ra12271f), 2015-01-01
Supplement: c5ra12271f1.pdf [file c5ra12271f1.pdf]

## Supporting Information

### Manipulation of Multiphase Morphology in Reactive Blending System of OBC/PLA/EGMA

Meng Wu, Ke Wang\*, Qin Zhang and Qiang Fu\*

*College of Polymer Science and Engineering, Sichuan University, State Key Laboratory of Polymer*

*Materials Engineering, Chengdu 610065, People's Republic of China*

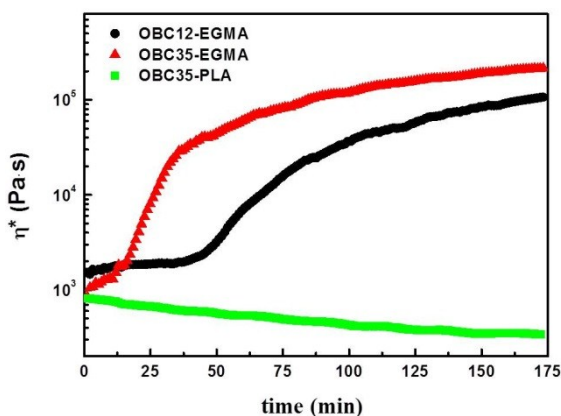

**Figure S1.** Plots of  $\eta^*$  (190 °C) vs. time for OBC12/EGMA, OBC35/EGMA, and OBC35/PLA.

Fig. S1 shows that the complex viscosities of OBC12/EGMA and OBC35/EGMA increase with time, indicating a strong interaction or chain entanglement<sup>[1]</sup> in these two blend pairs. In addition,  $\eta^*$  of polymer pair of OBC35/EGMA rises faster and ends up with higher value, suggesting stronger interaction between these two polymers as well.

[1] H. Y. Kim, U. Jeong and J. K. Kim, *Macromolecules*, 2003, 36, 1594-1602.

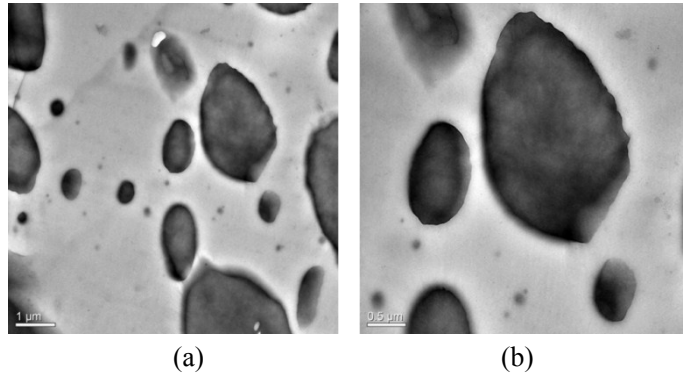

**Figure S2.** TEM micrographs of PLA/EGMA 7/3 binary blend mixed for 4 min: (a) low magnification, (b) higher magnification. (the scale bar is 1 μm for (a), and 500 nm for (b) )

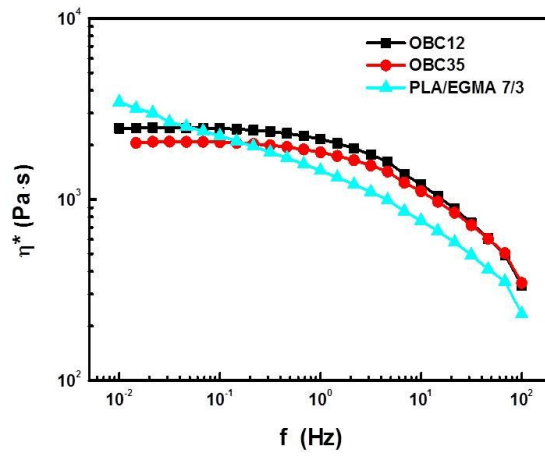

**Figure S3.** Plot of  $\eta^*$  at 190 °C vs frequency for OBC12, OBC35, and PLA/EGMA 7/3.

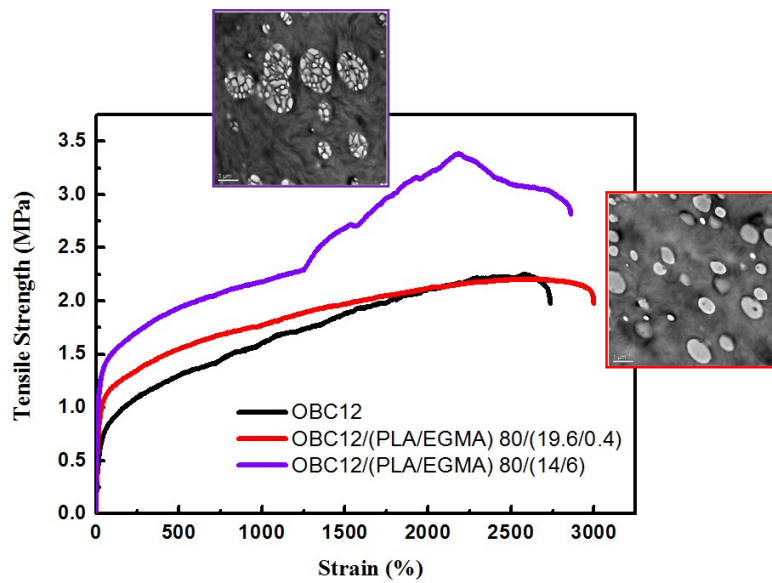

**Figure S4.** Tensile mechanical curves for pure OBC and ternary OBC/PLA/EGMA blends.

The mechanical enhancement is very limited in the OBC/PLA/EGMA blend with core-shell phase morphology, as compared to that of pure OBC. Nevertheless, obvious increment in tensile strength is realized for the ternary blend with salami-like phase morphology, and the ductility can be reserved well. This result suggests the importance of dispersed-phase morphology.
